# Supplementary material for: Exogenous plant MIR168a specifically targets mammalian LDLRAP1: evidence of cross-kingdom regulation by microRNA
Source: Springer Nature journal article supplement (doi:10.1038/cr.2011.158), 2011-09-20
Supplement: 41422_2012_BFcr2011158_MOESM266_ESM.pdf [file 41422_2012_BFcr2011158_MOESM266_ESM.pdf]

**Supplementary information, Table S1** The level and sequence of plant miRNAs in human serum.

| Name    | sequence               | ref miRNA   | male  | female | pool-1 | pool-2 | pool-3 | pool-4 | pool-5 | pool-6 | pool-7 | pool-8 | mean     |
|---------|------------------------|-------------|-------|--------|--------|--------|--------|--------|--------|--------|--------|--------|----------|
| MIR156a | UGACAGAAGAGAGUGAGCAC   | ath-miR156a | 12363 | 4866   | 8406   | 5831   | 10748  | 7627   | 12990  | 16097  | 3511   | 2299   | 8473.765 |
| MIR156g | CGACAGAAGAGAGUGAGCAC   | ath-miR156g | 0     | 0      | 12     | 12     | 30     | 11     | 36     | 30     | 87     | 31     | 24.939   |
| MIR157a | UUGACAGAAGAUAGAGAGCAC  | ath-miR157a | 0     | 0      | 421    | 369    | 279    | 343    | 718    | 6254   | 27     | 54     | 846.496  |
| MIR157d | UGACAGAAGAUAGAGAGCAC   | ath-miR157d | 0     | 0      | 23     | 28     | 0      | 0      | 24     | 0      | 3      | 7      | 8.495    |
| MIR159a | UUUGGAUUGAAGGGAGCUCUA  | ath-miR159a | 0     | 0      | 0      | 2      | 1      | 14     | 0      | 0      | 0      | 0      | 1.660    |
| MIR160a | UGCCUGGCUCCUGUAUGCCA   | ath-miR160a | 6     | 0      | 16     | 3      | 0      | 8      | 42     | 0      | 0      | 0      | 7.666    |
| MIR162a | UCGAUAAACCUCUGCAUCCAG  | ath-miR162a | 100   | 180    | 13     | 9      | 0      | 0      | 0      | 3      | 0      | 0      | 30.518   |
| MIR164a | UGGAGAAGCAGGGCACGUGCA  | ath-miR164a | 339   | 0      | 261    | 69     | 71     | 79     | 157    | 2126   | 3      | 4      | 310.954  |
| MIR164c | UGGAGAAGCAGGGCACGUGCG  | ath-miR164c | 0     | 0      | 0      | 16     | 0      | 0      | 0      | 0      | 0      | 0      | 1.560    |
| MIR165a | UCGGACCAGGCUUCAUCCCC   | ath-miR165a | 31    | 0      | 3      | 0      | 1      | 0      | 0      | 0      | 0      | 0      | 3.520    |
| MIR166a | UCGGACCAGGCUUCAUCCCC   | ath-miR166a | 3397  | 426    | 763    | 621    | 541    | 490    | 1189   | 89     | 8      | 3      | 752.545  |
| MIR167a | UGAAGCUGCCAGCAUGAUCUA  | ath-miR167a | 4000  | 524    | 223    | 146    | 205    | 131    | 761    | 58     | 3      | 6      | 605.641  |
| MIR167d | UGAAGCUGCCAGCAUGAUCUGG | ath-miR167d | 0     | 0      | 13     | 7      | 0      | 0      | 24     | 4      | 0      | 0      | 4.796    |
| MIR168a | UCGCUUGGUGCAGAUCCGGAC  | osa-miR168a | 27758 | 4555   | 5385   | 2742   | 4905   | 2962   | 8529   | 409    | 25     | 12     | 5728.093 |
| MIR169a | CAGCCAAGGAGACUUGCCGA   | ath-miR169a | 176   | 0      | 26     | 0      | 0      | 0      | 0      | 0      | 0      | 0      | 20.203   |
| MIR169b | CAGCCAAGGAGACUUGCCGG   | ath-miR169b | 1777  | 721    | 118    | 0      | 1      | 0      | 0      | 61     | 0      | 1      | 267.908  |
| MIR169h | UAGCCAAGGAGACUUGCCUG   | ath-miR169h | 0     | 16     | 0      | 0      | 0      | 0      | 0      | 0      | 0      | 0      | 1.638    |
| MIR171a | UGAUUGAGCCGCGCCAAUAUC  | ath-miR171a | 0     | 0      | 4      | 0      | 0      | 0      | 0      | 0      | 0      | 0      | 0.423    |
| MIR171c | UUGAGCCGUGCCAAUAUCACG  | ath-miR171c | 25    | 131    | 0      | 0      | 5      | 8      | 0      | 0      | 2      | 0      | 17.111   |
| MIR172a | AGAAUCUUGAUGAUGCUGCAU  | ath-miR172a | 1513  | 377    | 294    | 149    | 216    | 150    | 567    | 1297   | 1      | 0      | 456.427  |
| MIR172c | AGAAUCUUGAUGAUGCUGCAG  | ath-miR172c | 0     | 0      | 0      | 26     | 0      | 14     | 6      | 0      | 0      | 0      | 4.564    |
| MIR390a | AAGCUCAGGAGGGAUAGCGCC  | ath-miR390a | 63    | 16     | 1      | 0      | 6      | 8      | 6      | 0      | 0      | 0      | 10.054   |
| MIR394a | UUGGCAUUCUGUCCACCUCC   | ath-miR394a | 0     | 0      | 0      | 0      | 1      | 0      | 0      | 0      | 0      | 0      | 0.127    |
| MIR397a | UCAUUGAGUGCAGCGUUGAUG  | ath-miR397a | 207   | 0      | 2      | 3      | 0      | 0      | 66     | 0      | 0      | 0      | 27.875   |
| MIR408  | AUGCACUGCCUCUCCUCCUGGC | ath-miR408  | 0     | 0      | 3      | 0      | 1      | 0      | 0      | 0      | 0      | 0      | 0.465    |

|                                               |         |         |         |         |         |         |         |         |         |         |
|-----------------------------------------------|---------|---------|---------|---------|---------|---------|---------|---------|---------|---------|
| total reads of plant miRNA in human serum     | 51756   | 11812   | 15986   | 10033   | 17012   | 11843   | 25116   | 26428   | 3670    | 2417    |
| total reads of mammalian miRNA in human serum | 1000000 | 1000000 | 1000000 | 1000000 | 1000000 | 1000000 | 1000000 | 1000000 | 1000000 | 1000000 |
| plant miRNA/mammalian miRNA                   | 0.0518  | 0.0118  | 0.0160  | 0.0100  | 0.0170  | 0.0118  | 0.0251  | 0.0264  | 0.0037  | 0.0024  |

---
