# Supplementary material for: Exogenous plant MIR168a specifically targets mammalian LDLRAP1: evidence of cross-kingdom regulation by microRNA
Source: Springer Nature journal article supplement (doi:10.1038/cr.2011.158), 2011-09-20
Supplement: 41422_2012_BFcr2011158_MOESM267_ESM.pdf [file 41422_2012_BFcr2011158_MOESM267_ESM.pdf]

**Supplementary information, Table S2** The level and sequence of plant miRNAs in calf serum.

| Name                                         | sequence              | ref miRNA   | Solexa reads |
|----------------------------------------------|-----------------------|-------------|--------------|
| MIR156a                                      | UGACAGAAGAGAGUGAGCAC  | ath-miR156a | 927          |
| MIR157a                                      | UUGACAGAAGAUAGAGAGCAC | ath-miR157a | 2146         |
| MIR158a                                      | UCCCAAUAGUAGACAAAGCA  | ath-miR158a | 531          |
| MIR166a                                      | UCGGACCAGGCUUCAUCCCC  | ath-miR166a | 63           |
| MIR167a                                      | UGAAGCUGCCAGCAUGAUCUA | ath-miR167a | 512          |
| MIR168a                                      | UCGCUUGGUGCAGAUCCGGAC | osa-miR168a | 345          |
| MIR172a                                      | AGAAUCUUGAUGAUGCUGCAU | ath-miR172a | 309          |
| total reads of plant miRNA in calf serum     |                       |             | 4834         |
| total reads of mammalian miRNA in calf serum |                       |             | 1000000      |
| plant miRNA/mammalian miRNA                  |                       |             | 0.0048       |
