# Supplementary material for: Exogenous plant MIR168a specifically targets mammalian LDLRAP1: evidence of cross-kingdom regulation by microRNA
Source: Springer Nature journal article supplement (doi:10.1038/cr.2011.158), 2011-09-20
Supplement: 41422_2012_BFcr2011158_MOESM271_ESM.pdf [file 41422_2012_BFcr2011158_MOESM271_ESM.pdf]

# Supplementary information, Figure S1

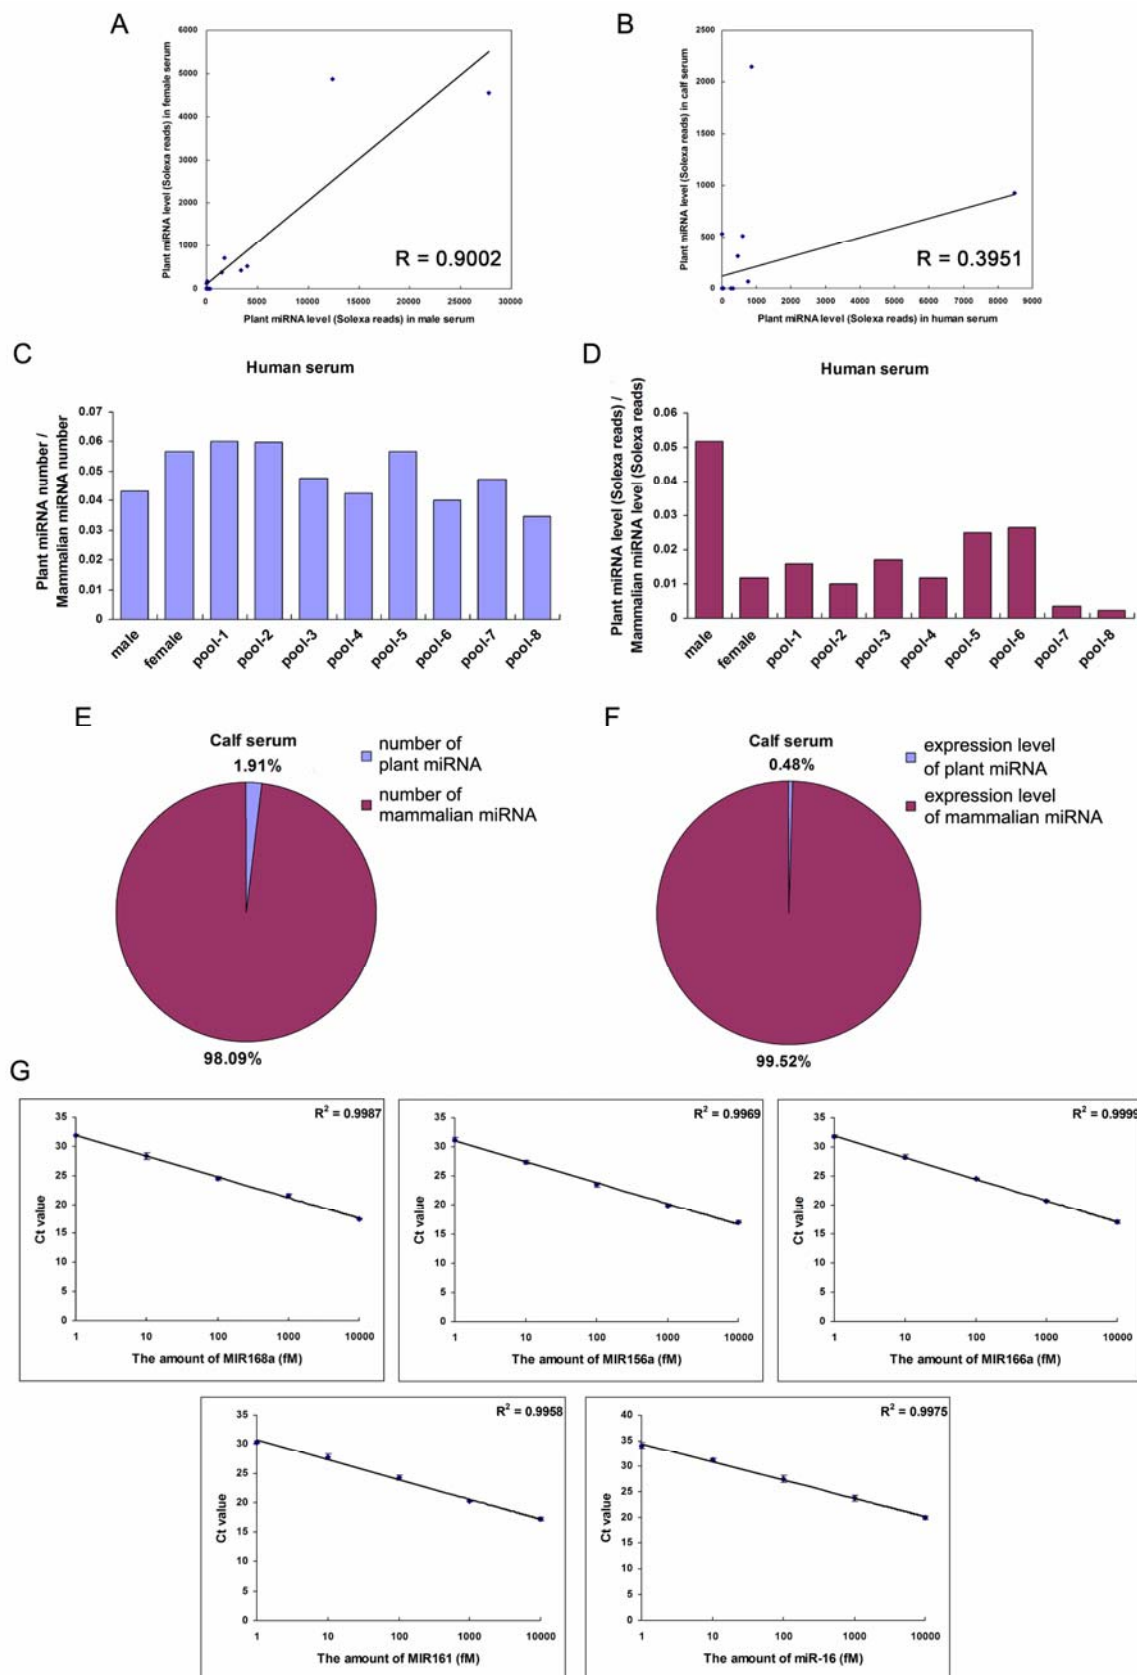

**Figure S1** The detection and analysis of plant miRNAs in serum samples of mammals. **(A)** A comparison of plant miRNAs detected by Solexa sequencing in Chinese male and female sera. **(B)** A comparison of plant miRNAs detected by Solexa sequencing in human and calf sera. **(C-D)** The numbers and expression levels of plant miRNA species versus the numbers and expression levels of mammalian miRNA species in human sera. **(E-F)** The numbers and expression levels of plant miRNA species versus the numbers and expression levels of mammalian miRNA species in calf sera. **(G)** The representative standard curve for plant miRNAs. For each assay, a standard calibration curve was prepared by a 10-fold serial dilution of the synthetic single-strand MIR168a, MIR156a, MIR166a, MIR161, or miR-16 (synthesized by TaKaRa, Dalian, China) from 1 fM to  $10^4$  fM, and the level of each miRNA was assessed by the qRT-PCR assay. The resulting  $C_T$  values were plotted versus the amount of input miRNA. Each point represents the mean of three independent experiments.
