# Supplementary material for: Exogenous plant MIR168a specifically targets mammalian LDLRAP1: evidence of cross-kingdom regulation by microRNA
Source: Springer Nature journal article supplement (doi:10.1038/cr.2011.158), 2011-09-20
Supplement: 41422_2012_BFcr2011158_MOESM277_ESM.pdf [file 41422_2012_BFcr2011158_MOESM277_ESM.pdf]

## Supplementary information, Figure S7

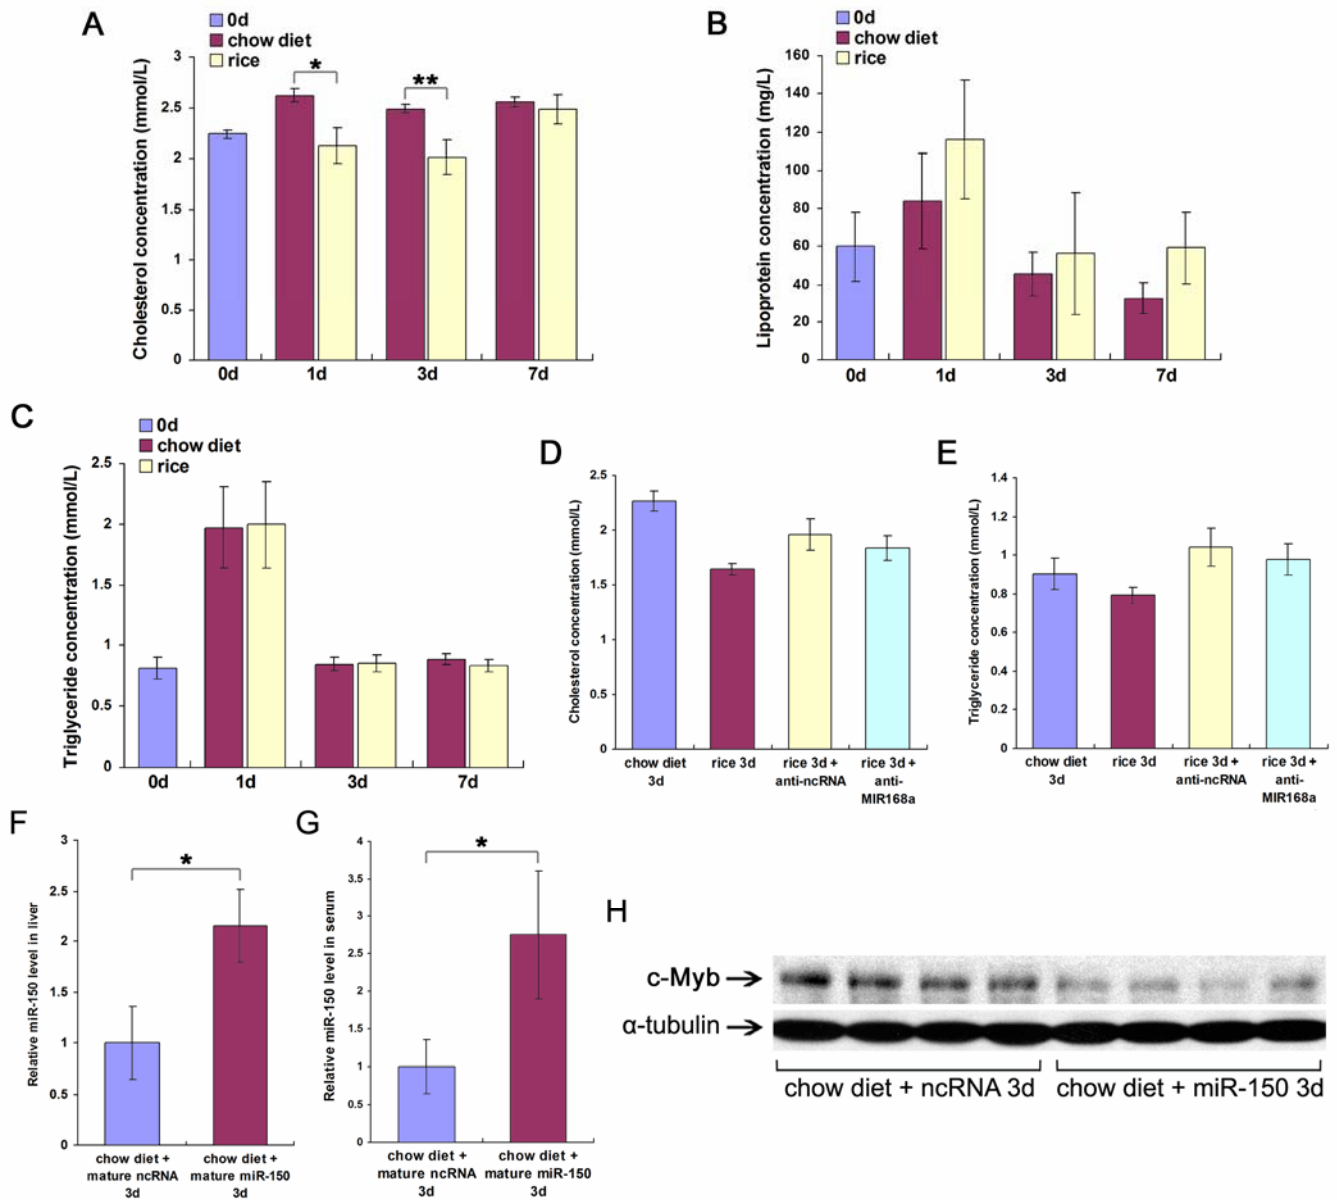

**Figure S7** The effects of the rice-derived MIR168a and supplemental mature miR-150 in chow diet on mouse plasma cholesterol, lipoprotein, and triglycerides and liver c-Myb protein levels. **(A-C)** The levels of cholesterol **(A)**, lipoprotein **(B)**, and triglycerides **(C)** in mouse plasma after chow diet or fresh rice feeding ( $n = 8$ ). **(D-E)** The levels of cholesterol **(D)** and triglycerides **(E)** in mouse plasma after 3 days of feeding with chow diet, fresh rice or fresh rice with an injection of anti-ncRNA or anti-MIR168a ( $n = 8$ ). **(F-G)** The relative levels of miR-150 in mouse livers **(F)** and sera **(G)** after 3 days feeding with chow diet and either mature ncRNA or mature miR-150 for 3 days ( $n = 8$ ). **(H)** The c-Myb protein levels in mouse livers after 3 days of feeding with chow diet and either mature ncRNA or mature miR-150 ( $n = 8$ ). \* $P < 0.05$ ; \*\* $P < 0.01$ .
